# Supplementary material for: Factors influencing mothers’ decisions regarding obstetrical care in Western Kenya: a mixed-methods study
Source: Springer Nature journal article supplement (doi:10.1186/s12905-021-01355-9), 2021-05-19
Supplement: MOESM1 [file 19177702]

# Interview Questionnaire

Record ID

\_\_\_\_\_

Date

\_\_\_\_\_

Participant ID

(K(B, S or Y) 00 #/C/(Month)16)

1. What is your age?

\_\_\_\_\_

2. What is your marital status?

- Single  
 Married  
 Divorced  
 Separated  
 Widowed

3. Which district do you live in?

- Bondo  
 Siaya district  
 Yala  
 Other

3. a. Specify:

\_\_\_\_\_

4. Did you attend formal school?

- Yes  
 No

4. a. If yes, what is your highest completed level of education?

- Primary  
 Some secondary  
 Completed secondary  
 College/ University  
 Graduate level (Masters/ PhD)

## I would like to ask you questions regarding the most recent pregnancy and previous pregnancies:

5. How many pregnancies, including the past one, have you had?

\_\_\_\_\_

5. a. How many were born at home?

\_\_\_\_\_

5. b. How many were born at the hospital?

\_\_\_\_\_

6. When was your most recent pregnancy?

\_\_\_\_\_  
(Precise if it is the number of years, months or days since your last pregnancy)

**Where did you give birth?**

|                                    | Home                  | Health Facility       | Other                 |
|------------------------------------|-----------------------|-----------------------|-----------------------|
| 7. For your last pregnancy:        | <input type="radio"/> | <input type="radio"/> | <input type="radio"/> |
| 8. For the next to last pregnancy: | <input type="radio"/> | <input type="radio"/> | <input type="radio"/> |

8. a. Specify

(Specify for both pregnancies if needed)

**If you delivered at home, what was the cause cause? Select all that apply**

|                                    | Personal choice          | Lack of transportation   | Could not afford it      | Other                    |
|------------------------------------|--------------------------|--------------------------|--------------------------|--------------------------|
| 9. For the last pregnancy          | <input type="checkbox"/> | <input type="checkbox"/> | <input type="checkbox"/> | <input type="checkbox"/> |
| 10. For the next to last pregnancy | <input type="checkbox"/> | <input type="checkbox"/> | <input type="checkbox"/> | <input type="checkbox"/> |

10. a. Specify:

(Specify for both pregnancies if needed)

**What was the reason for you to go to a health facility? Select all that apply**

|                                     | I came on my own         | I was referred from a lower level health facility | I had complications like bleeding | The baby would not come out | I had headaches          | Other                    |
|-------------------------------------|--------------------------|---------------------------------------------------|-----------------------------------|-----------------------------|--------------------------|--------------------------|
| 11. For the last pregnancy:         | <input type="checkbox"/> | <input type="checkbox"/>                          | <input type="checkbox"/>          | <input type="checkbox"/>    | <input type="checkbox"/> | <input type="checkbox"/> |
| 12. For the next to last pregnancy: | <input type="checkbox"/> | <input type="checkbox"/>                          | <input type="checkbox"/>          | <input type="checkbox"/>    | <input type="checkbox"/> | <input type="checkbox"/> |

12. a. Specify:

(Specify for both pregnancies if needed)

**If you were referred, which facility were you referred FROM?**

|                                        | Government dispensary | Government Sub-County | County Referral       | Private nursing home or hospita |
|----------------------------------------|-----------------------|-----------------------|-----------------------|---------------------------------|
| 13. For the last pregnancy             | <input type="radio"/> | <input type="radio"/> | <input type="radio"/> | <input type="radio"/>           |
| 14. For the next to the last pregnancy | <input type="radio"/> | <input type="radio"/> | <input type="radio"/> | <input type="radio"/>           |

**If you were referred, which facility were you referred TO?**

|                            | Government dispensary | Government Sub-County | County Referral       | Private nursing or hospital |
|----------------------------|-----------------------|-----------------------|-----------------------|-----------------------------|
| 15. For the last Pregnancy | <input type="radio"/> | <input type="radio"/> | <input type="radio"/> | <input type="radio"/>       |

16. For the next to the last Pregnancy

### How did you get to the health facility?

|                                        | Walk                  | Motor vehicle         | Cart/ Bicycle/<br>tricycle | Boat                  | Ambulance<br>(motorized or<br>bicycle) | Other                 |
|----------------------------------------|-----------------------|-----------------------|----------------------------|-----------------------|----------------------------------------|-----------------------|
| 17. For the last pregnancy:            | <input type="radio"/> | <input type="radio"/> | <input type="radio"/>      | <input type="radio"/> | <input type="radio"/>                  | <input type="radio"/> |
| 18. For the next to the last pregnancy | <input type="radio"/> | <input type="radio"/> | <input type="radio"/>      | <input type="radio"/> | <input type="radio"/>                  | <input type="radio"/> |

18. a. Specify:

(Specify for both pregnancies if needed)

### Which kind was the transportation?

|                                        | Public                | Private               | Not Applicable        |
|----------------------------------------|-----------------------|-----------------------|-----------------------|
| 19. For the last pregnancy:            | <input type="radio"/> | <input type="radio"/> | <input type="radio"/> |
| 20. For the next to the last pregnancy | <input type="radio"/> | <input type="radio"/> | <input type="radio"/> |

21. How much did the transportation cost(Ksh) for the last pregnancy? \_\_\_\_\_

22. How much did the transportation cost(Ksh) for the next to the last pregnancy? \_\_\_\_\_

### How long did it take you to get to the facility?

|                                         | 5 - 29 min            | 30 - 59 min           | 60 - 89 min           | 90 - 119 min          | More than 2hrs<br>(120min) |
|-----------------------------------------|-----------------------|-----------------------|-----------------------|-----------------------|----------------------------|
| 23. For the last pregnancy:             | <input type="radio"/> | <input type="radio"/> | <input type="radio"/> | <input type="radio"/> | <input type="radio"/>      |
| 24. For the next to the last pregnancy: | <input type="radio"/> | <input type="radio"/> | <input type="radio"/> | <input type="radio"/> | <input type="radio"/>      |

### How far was the health facility

|                                         | Less than 1 km        | 1 - 4 km              | 5 - 9 km              | 10 - 15 km            | More than 15 km       |
|-----------------------------------------|-----------------------|-----------------------|-----------------------|-----------------------|-----------------------|
| 25. For the last pregnancy:             | <input type="radio"/> | <input type="radio"/> | <input type="radio"/> | <input type="radio"/> | <input type="radio"/> |
| 26. For the next to the last pregnancy: | <input type="radio"/> | <input type="radio"/> | <input type="radio"/> | <input type="radio"/> | <input type="radio"/> |

**How did you deliver?**

|                                         | Vaginal               | C-section             |
|-----------------------------------------|-----------------------|-----------------------|
| 27. For the last pregnancy:             | <input type="radio"/> | <input type="radio"/> |
| 28. For the next to the last pregnancy: | <input type="radio"/> | <input type="radio"/> |

**If you had a c-section; did you have anesthesia?**

|                                         | Yes                   | No                    |
|-----------------------------------------|-----------------------|-----------------------|
| 29. For the last pregnancy:             | <input type="radio"/> | <input type="radio"/> |
| 30. For the next to the last pregnancy: | <input type="radio"/> | <input type="radio"/> |

**Was the baby preterm?**

|                                         | Yes                   | No                    |
|-----------------------------------------|-----------------------|-----------------------|
| 31. For the last pregnancy:             | <input type="radio"/> | <input type="radio"/> |
| 32. For the next to the last pregnancy: | <input type="radio"/> | <input type="radio"/> |

33. At what gestation stage did you deliver for the last pregnancy? \_\_\_\_\_

34. At what gestation stage did you deliver for the next to last pregnancy? \_\_\_\_\_

**What was the condition of the baby delivered?**

|                                    | Alive                 | Stillbirth            | Born- died within 48hrs |
|------------------------------------|-----------------------|-----------------------|-------------------------|
| 35. For the last pregnancy:        | <input type="radio"/> | <input type="radio"/> | <input type="radio"/>   |
| 36. For the next to last pregnancy | <input type="radio"/> | <input type="radio"/> | <input type="radio"/>   |

37. What was the weight of the baby at birth for the last pregnancy? \_\_\_\_\_

(Precise if it is in Kg or lbs)

38. What was the weight of the baby at birth for the next to the last pregnancy? \_\_\_\_\_

(Precise if it is in Kg or lbs)

**If the baby died after birth; what was the cause of the newborn's death?**

|                                         | Preterm               | Fever                 | Breathing difficulty  | Yellow eyes/skin (Jaundice) | Other                 | Not applicable        |
|-----------------------------------------|-----------------------|-----------------------|-----------------------|-----------------------------|-----------------------|-----------------------|
| 39. For the last pregnancy:             | <input type="radio"/> | <input type="radio"/> | <input type="radio"/> | <input type="radio"/>       | <input type="radio"/> | <input type="radio"/> |
| 40. For the next to the last pregnancy: | <input type="radio"/> | <input type="radio"/> | <input type="radio"/> | <input type="radio"/>       | <input type="radio"/> | <input type="radio"/> |

Specify:

(Specify for both pregnancies if applicable)

**If the baby died after birth, what was the location of the newborn's death**

|                                         | Home                  | Hospital              | Other                 |
|-----------------------------------------|-----------------------|-----------------------|-----------------------|
| 41. For the last pregnancy:             | <input type="radio"/> | <input type="radio"/> | <input type="radio"/> |
| 42. For the next to the last pregnancy: | <input type="radio"/> | <input type="radio"/> | <input type="radio"/> |

Specify:

\_\_\_\_\_

43. How much in total did you pay for the obstetric procedure for your last pregnancy?

(Ksh) \_\_\_\_\_

44. How much in total did you pay for the obstetric procedure for the next to your last pregnancy?

(Ksh) \_\_\_\_\_

**All in all, were you satisfied with the services that you received during your stay in the delivery ward?**

|                                         | Not at all            | To a small extend     | To some extend        | To a large extend     | To a very large extend | Not sure              |
|-----------------------------------------|-----------------------|-----------------------|-----------------------|-----------------------|------------------------|-----------------------|
| 45. For the last pregnancy:             | <input type="radio"/> | <input type="radio"/> | <input type="radio"/> | <input type="radio"/> | <input type="radio"/>  | <input type="radio"/> |
| 46. For the next to the last pregnancy: | <input type="radio"/> | <input type="radio"/> | <input type="radio"/> | <input type="radio"/> | <input type="radio"/>  | <input type="radio"/> |

**How long did you wait before being seen by a provider?**

|                                        | 0 - 14 min            | 15 - 29 min           | 30 - 44 min           | 45 - 59 min           | 1 hr or longer        |
|----------------------------------------|-----------------------|-----------------------|-----------------------|-----------------------|-----------------------|
| 47. For the last pregnancy:            | <input type="radio"/> | <input type="radio"/> | <input type="radio"/> | <input type="radio"/> | <input type="radio"/> |
| 48. For the next to the last pregnancy | <input type="radio"/> | <input type="radio"/> | <input type="radio"/> | <input type="radio"/> | <input type="radio"/> |

49. For your most recent pregnancy, how many people were present in the delivery room?

\_\_\_\_\_

**On average rank the confidence that you had in these following health personnel's professional competence:**

|             | Not at all            | To a small extend     | To some extend        | To a large extend     | To a very large extend | Not sure              |
|-------------|-----------------------|-----------------------|-----------------------|-----------------------|------------------------|-----------------------|
| 50. Nurses  | <input type="radio"/> | <input type="radio"/> | <input type="radio"/> | <input type="radio"/> | <input type="radio"/>  | <input type="radio"/> |
| 51. KRNAs   | <input type="radio"/> | <input type="radio"/> | <input type="radio"/> | <input type="radio"/> | <input type="radio"/>  | <input type="radio"/> |
| 52. Doctors | <input type="radio"/> | <input type="radio"/> | <input type="radio"/> | <input type="radio"/> | <input type="radio"/>  | <input type="radio"/> |

**What happened when you received anesthesia:**

|                                                                                   | Yes                                                                                                                                                                                                                                        | No                    |
|-----------------------------------------------------------------------------------|--------------------------------------------------------------------------------------------------------------------------------------------------------------------------------------------------------------------------------------------|-----------------------|
| 53. Did you go to sleep?                                                          | <input type="radio"/>                                                                                                                                                                                                                      | <input type="radio"/> |
| 54. Did they stick a needle in your back and you were awake?                      | <input type="radio"/>                                                                                                                                                                                                                      | <input type="radio"/> |
| <hr/>                                                                             |                                                                                                                                                                                                                                            |                       |
| 55. Are you familiar with the cost of C/S?                                        | <input type="radio"/> Yes<br><input type="radio"/> No                                                                                                                                                                                      |                       |
| <hr/>                                                                             |                                                                                                                                                                                                                                            |                       |
| 56. Is the total cost equal to:                                                   | <input type="radio"/> 1 day's wage<br><input type="radio"/> 1 week's wage<br><input type="radio"/> 1 month's wage<br><input type="radio"/> 3 month's wage<br><input type="radio"/> 6 month's wage<br><input type="radio"/> 12 month's wage |                       |
| <hr/>                                                                             |                                                                                                                                                                                                                                            |                       |
| 57. Do you think improvements could be made in service delivery in this facility? | <input type="radio"/> Yes<br><input type="radio"/> No                                                                                                                                                                                      |                       |
| <hr/>                                                                             |                                                                                                                                                                                                                                            |                       |
| 57. a. If yes, which ones?                                                        | _____                                                                                                                                                                                                                                      |                       |
| <hr/>                                                                             |                                                                                                                                                                                                                                            |                       |
| 58. Would you return to this facility for a C/S for your next child?              | <input type="radio"/> Yes<br><input type="radio"/> No                                                                                                                                                                                      |                       |
| <hr/>                                                                             |                                                                                                                                                                                                                                            |                       |
| 58. a. Why?                                                                       | _____                                                                                                                                                                                                                                      |                       |
| <hr/>                                                                             |                                                                                                                                                                                                                                            |                       |
| 59. If you had a non-obstetric emergency, would you come to this facility?        | <input type="radio"/> Yes<br><input type="radio"/> No                                                                                                                                                                                      |                       |
| <hr/>                                                                             |                                                                                                                                                                                                                                            |                       |
| 60. Did anyone give you a chance to give feedback about your experience?          | <input type="radio"/> Yes<br><input type="radio"/> No                                                                                                                                                                                      |                       |
| <hr/>                                                                             |                                                                                                                                                                                                                                            |                       |
| 60.a. If Not, would that be helpful to you?                                       | <input type="radio"/> Yes<br><input type="radio"/> No                                                                                                                                                                                      |                       |
| <hr/>                                                                             |                                                                                                                                                                                                                                            |                       |
| 60. b. Why?                                                                       | _____                                                                                                                                                                                                                                      |                       |
| <hr/>                                                                             |                                                                                                                                                                                                                                            |                       |
| 61. Have you used the services of a Traditional Birth Attendant (TBA)?            | <input type="radio"/> Yes<br><input type="radio"/> No                                                                                                                                                                                      |                       |

**61.a. If you have used the services of a Traditional Birth Attendant:**

|                                                                     | Not at all            | To a small extent     | To some extent        | To a large extent     | To a very large extent | not sure              |
|---------------------------------------------------------------------|-----------------------|-----------------------|-----------------------|-----------------------|------------------------|-----------------------|
| How satisfied were you with the services you received from the TBA? | <input type="radio"/> | <input type="radio"/> | <input type="radio"/> | <input type="radio"/> | <input type="radio"/>  | <input type="radio"/> |

|                                                                                     | Very Negative         | Negative              | Neutral               | Positive              | Very Positive         |
|-------------------------------------------------------------------------------------|-----------------------|-----------------------|-----------------------|-----------------------|-----------------------|
| 62. Rank the perception of the community on obstetric care at this health facility: | <input type="radio"/> | <input type="radio"/> | <input type="radio"/> | <input type="radio"/> | <input type="radio"/> |

63. Did you know that there are newly trained anesthesia nurses who have been employed by this hospital and that they help with safe C/S?

Yes  
 No

64. Does being aware of this make you more comfortable going to the Hospital for surgery?

Yes  
 No
